# Supplementary material for: Investigating Visitor Activity on a Safari Drive
Source: MDPI journal article supplement (doi:10.3390/jzbg2040041), 2021-11-10
Supplement: s1 [file s1]

Table S1. Full output from linear mixed model to determine the effect of species traits and exhibit features on the average speed of focal vehicles (mph).

| Random Effects                 |             |                          |                                |                       |                             |                |
|--------------------------------|-------------|--------------------------|--------------------------------|-----------------------|-----------------------------|----------------|
| Group                          | Name        | Variance                 | Standard Deviation             |                       |                             |                |
| Exhibit                        | (Intercept) | 0.00169                  | 0.04111                        |                       |                             |                |
| Residual                       |             | 0.17760                  | 0.42143                        |                       |                             |                |
| Fixed Effects                  |             |                          |                                |                       |                             |                |
|                                | Estimate    | Standard Error           | T Value                        |                       |                             |                |
| Intercept                      | 1.79512     | 0.09818                  | 18.284                         |                       |                             |                |
| Species Status: Integral       | 1.01909     | 0.13054                  | 7.807                          |                       |                             |                |
| Visibility of Species: Visible | -0.28156    | 0.05580                  | -5.046                         |                       |                             |                |
| Exhibit Type: Through          | -1.09667    | 0.15468                  | -7.090                         |                       |                             |                |
| Species Activity Level: Low    | 0.51704     | 0.10497                  | 4.926                          |                       |                             |                |
| Length of Road                 | 0.61794     | 0.13731                  | 4.500                          |                       |                             |                |
| Species Size                   | 0.43076     | 0.10479                  | 4.111                          |                       |                             |                |
| Correlation of Fixed Effects   |             |                          |                                |                       |                             |                |
|                                | (Intr)      | Species Status: Integral | Visibility of Species: Visible | Exhibit Type: Through | Species Activity Level: Low | Length of Road |
| Species Status: Integral       | 0.236       |                          |                                |                       |                             |                |
| Visibility of Species: Visible | -0.710      | -0.020                   |                                |                       |                             |                |
| Exhibit Type: Through          | -0.788      | -0.493                   | 0.325                          |                       |                             |                |
| Species Activity Level: Low    | 0.107       | -0.622                   | -0.105                         | -0.197                |                             |                |
| Length of Road                 | 0.614       | 0.856                    | -0.280                         | -0.780                | -0.375                      |                |
| Species Size                   | 0.437       | 0.905                    | -0.134                         | -0.617                | -0.542                      | 0.947          |
